# Supplementary material
Source: publisher site journal article supplement (https://www.dovepress.com/article/314895)
Supplement: Supplementary file 1 [file get_supplementary_file.php]

1  
2  
3  
4  
5  
6  
7  
8  
9  
10  
11  
12  
13  
14  
15  
16

*Supporting Information*

**Doxorubicin delivered via ApoE-directed reduction-sensitive polymersomes potently inhibit orthotopic human glioblastoma xenografts in nude mice**

Jia Ouyang<sup>1</sup>, Yu Jiang<sup>2</sup>, Chao Deng<sup>2</sup>, Zhiyuan Zhong<sup>2,\*</sup>, Qing Lan<sup>1,\*</sup>

<sup>1</sup>Department of Neurosurgery, the Second Affiliated Hospital of Soochow University, Suzhou, 215004 China. \*Corresponding author. Tel.: +86-512-67784087. E-mail: [szlq006@163.com](mailto:szlq006@163.com) (Q. Lan).

<sup>2</sup>Biomedical Polymers Laboratory, College of Chemistry, Chemical Engineering and Materials Science, and State Key Laboratory of Radiation Medicine and Protection, Soochow University, Suzhou 215123, China. \*Corresponding authors. Tel./Fax: +86-512-65880098. E-mail: [zyzhong@suda.edu.cn](mailto:zyzhong@suda.edu.cn) (Z. Zhong).

## 17 **Materials**

18 Trimethylene carbonate (TMC) was recrystallized over dry toluene. ApoE (ApoE, 98%,  
19 China Peptides Company, Ltd.), glutathione (GSH, 99%, Roche), and doxorubicin  
20 hydrochloride (DOX·HCl, 99%, Beijing Zhongshuo Pharmaceutical Technology Development)  
21 were used as received. Dithiolane trimethylene carbonate (DTC) was synthesized as our  
22 previous report.<sup>1</sup>

23

## 24 **Preparation and characterization of ApoE-PS**

25 PEG-P(TMC-DTC) and ApoE-PEG-P(TMC-DTC) diblock copolymers were synthesized  
26 as our previous report.<sup>1-2</sup> ApoE-PS was prepared from PEG-P(TMC-DTC) and ApoE-PEG-  
27 P(TMC-DTC) via the solvent exchange method. Typically, 100  $\mu$ L of DMF solution of PEG-  
28 P(TMC-DTC) and ApoE-PEG-P(TMC-DTC) (10.0 mg/mL) was added to 900  $\mu$ L of citrate  
29 buffer (10 mM, pH 4), and the mixed solution was placed at 37 °C for 1 hour. After adjusting  
30 the pH to 7.8 using Na<sub>2</sub>HPO<sub>4</sub> (2M), a predetermined amount of DOX·HCl was added, and the  
31 solution was stirred for 15 min and stood at 37°C for overnight, followed by dialysis  
32 (Spectra/Pore, MWCO 7000) against PB for 6 h. The resulting formulations were denoted as  
33 ApoEx-PS-DOX, wherein x represents the molar percentage of ApoE-PEG-P(TMC-DTC). The  
34 stability of ApoE-PS-DOX against extensive dilution or 10% FBS and reduction-sensitivity  
35 against 10 mM GSH were investigated by tracking the size changes using DLS. Transmission  
36 electron microscopy (TEM) was carried out using a Tecnai G220 TEM operated at an  
37 accelerating voltage of 200 kV. The samples were prepared by dropping 20  $\mu$ L of 0.5 mg/mL  
38 polymersomes suspension on the copper grid followed by staining with 1.0 wt.%  
39 phosphotungstic acid.

40

41

## 42 **Cell viability assay**

43 The cytotoxicity of ApoE-PS and ApoE-PS-DOX was evaluated using MTT assays in  
44 LRP1, LRP2, and LDLR overexpressing U-87 MG glioma cancer cells. The U-87 MG cells

45 ( $5 \times 10^3$ /well) were seeded in a 96-well plate for 24 h. DOX·HCl, Lipo-DOX, PS-DOX, and  
46 ApoE-PS-DOX with different ApoE contents (10 ~ 30 mol.%) in 10  $\mu$ L of PBS were added,  
47 and the DOX concentrations ranged from 0.01  $\mu$ g/mL to 20  $\mu$ g/mL. The cells following 4 h  
48 treatment were incubated in fresh media for another 44 h. Then, 10  $\mu$ L of MTT was added to  
49 each well. The plates were incubated at 37°C for 4 h prior to reading OD<sub>492</sub> nm on a microplate  
50 reader (Varioskan, Thermo, USA). The cell viability was determined by the 3-(4,5-  
51 dimethylthiazol-2-yl)-2,5-diphenyltetrazoliumbromide (MTT) assays. The cytotoxicity of  
52 blank ApoE-PS was assessed in U-87 MG cells following 48 h incubation at a concentration of  
53 0.1-0.5 mg/mL.

54

#### 55 **Endocytosis analysis**

56 U-87 MG cells were seeded in a 6-well plate ( $5-10 \times 10^5$  cells/well) overnight, followed  
57 by the treatment with ApoE-PS-DOX, DOX·HCl, or Lipo-DOX in 1.0 mL of PBS (DOX·HCl  
58 concentration: 10  $\mu$ g/mL) at 37 °C for 4 h. Then, the cells were digested by 0.25% (w/v) trypsin  
59 and 0.03% (w/v) EDTA, and the fluorescence histograms were immediately recorded with a  
60 BD FACS Calibur flow cytometer (Becton Dickinson, USA) and analyzed using Cell Quest  
61 software based on 10,000 gated events.

62 For CLSM observation, U-87 MG cells were seeded in 24-well plate at a density of  $5 \times$   
63  $10^4$  cells/well and cultured with DMEM medium under 5 % CO<sub>2</sub> atmosphere at 37 °C overnight.  
64 Then the cells were incubated with ApoE20-PS-DOX or PS-DOX (DOX·HCl concentration:  
65 10  $\mu$ g/mL) at 37 °C for 4 h. The cells were further cultured in fresh medium for 4 h and fixed  
66 with 4% paraformaldehyde solution for 15 min. The cell nuclei were stained with 4',6-  
67 diamidino-2-phenylindole (DAPI) for 10 min. The fluorescence images were obtained using a  
68 confocal microscope (TCS SP5).

69

## 70 **Western blot assay**

71        Approximately  $1.0\text{-}1.5\times 10^5$  U-87 MG cells per well were plated in six-well plates, and  
72 treated with Lipo-DOX, PS-DOX, or ApoE-PS-DOX at a DOX·HCl concentration of 5.0  
73  $\mu\text{g}/\text{mL}$  for 4 h. The media were removed and replaced by fresh media. The cells were incubated  
74 for another 44 h and then harvested and lysed with RIPA buffer (Beyotime Biotechnology,  
75 Nantong, China) supplemented with protease and phosphatase inhibitors (Beyotime  
76 Biotechnology). BCA Protein Assay kit (Beyotime Biotechnology) was used to determine the  
77 concentrations of the collected proteins. Protein (30-50  $\mu\text{g}$ ) was separated by sodium dodecyl  
78 sulfonate (SDS)-polyacrylamide gel electrophoresis using 12% gel and then transferred to  
79 polyvinylidene fluoride (PVDF) membranes (Millipore, Billerica, MA, USA). The membranes  
80 were blocked with 5% BSA for 1 h at room temperature and probed with specific antibodies at  
81 4 °C overnight. After washing with Tris-buffered saline/0.1% Tween-20 (TBST), the  
82 membranes were incubated with secondary antibodies, and the expression of protein was  
83 detected by electrochemiluminescence (ECL) assay (Millipore, Billerica, MA, USA).

84

## 85 **In vivo pharmacokinetics and biodistribution**

86        For pharmacokinetic studies, 150  $\mu\text{L}$  of ApoE-PS-DOX, PS-DOX or Lipo-DOX (10 mg  
87 DOX·HCl equiv./kg) was intravenously injected via the tail vein ( $n = 3$ ). At different time  
88 points, about 20  $\mu\text{L}$  collected blood was dissolved in 100  $\mu\text{L}$  Triton X-100 (1%) with brief  
89 sonification. DOX was extracted by using a DMF solution containing 20 mM dithiothreitol  
90 (DTT) overnight at 25 °C. After centrifugation at 10,000 rpm for 20 min, DOX concentration  
91 in the supernatant was determined by using fluorescence measurement ( $\lambda_{\text{ex}} = 480 \text{ nm}$ ,  $\lambda_{\text{em}} =$   
92 560 nm). The blood circulation half-lives ( $t_{1/2,\alpha}$  and  $t_{1/2,\beta}$ ) were obtained by second-order  
93 exponential decay fits.

94        For in vivo biodistribution study, orthotopic U87 tumor-bearing nude mice were randomly

95 grouped (n = 3), and 150  $\mu$ L of ApoE-PS-DOX, PS-DOX or Lipo-DOX in PB were i.v. injected  
96 via tail veins at a DOX concentration of 10 mg equiv./kg. The mice were sacrificed at 8 h post  
97 injection. The major organs or brain tumors were collected, washed with PBS, wiped with  
98 tissues, and quickly homogenized. DMF solution that containing 20 mM DTT was used to  
99 extract DOX overnight at 25°C. Following centrifugation at 10,000 rpm for 30 min, DOX  
100 concentration in the supernatant was determined by fluorescence measurement (n = 3).

101

## 102 **Statistical analysis**

103 Data were presented as mean  $\pm$  standard deviation. Differences between groups were  
104 assessed using one-way analysis of variance. Statistical significance was defined as \*p < 0.05,  
105 \*\*p < 0.01 and \*\*\*p < 0.001.

106

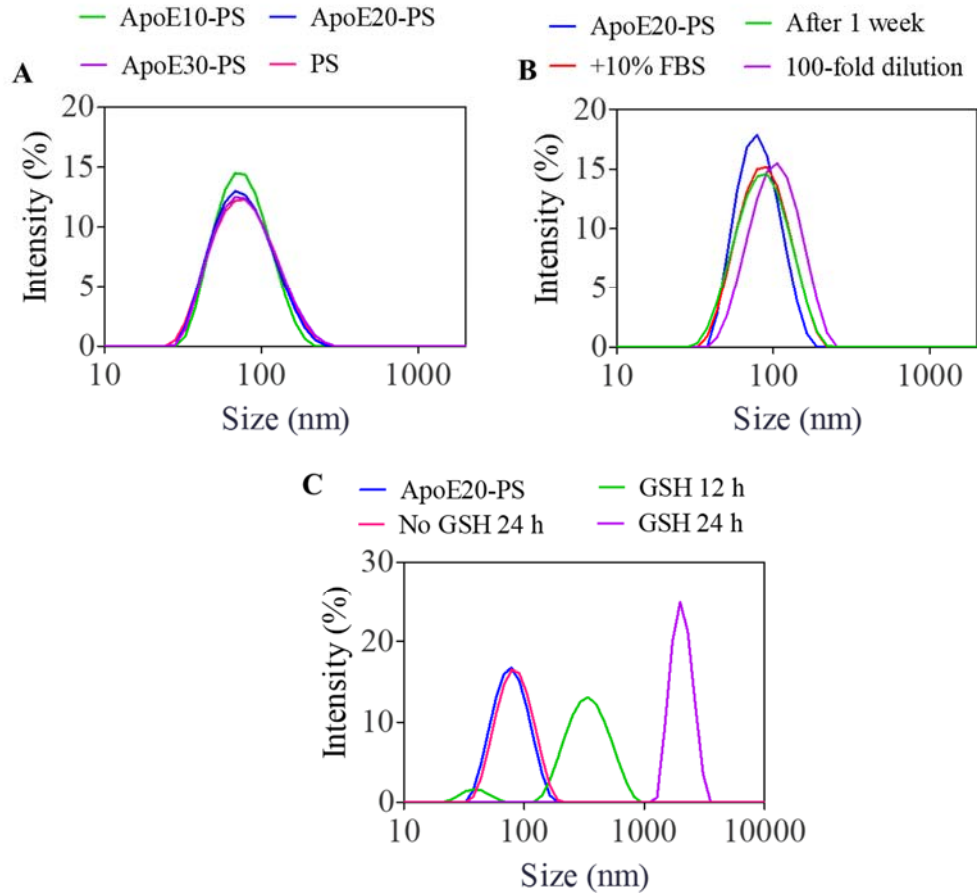

107  
108  
109  
110  
111

**Figure S1** Characterizations of PS and ApoE-PS. (A) Size distribution determined by DLS. (B) Stability of ApoE20-PS under different conditions (1 week in PB, 10% FBS, 100-fold dilution). (C) Responsiveness of ApoE20-PS under GSH conditions.

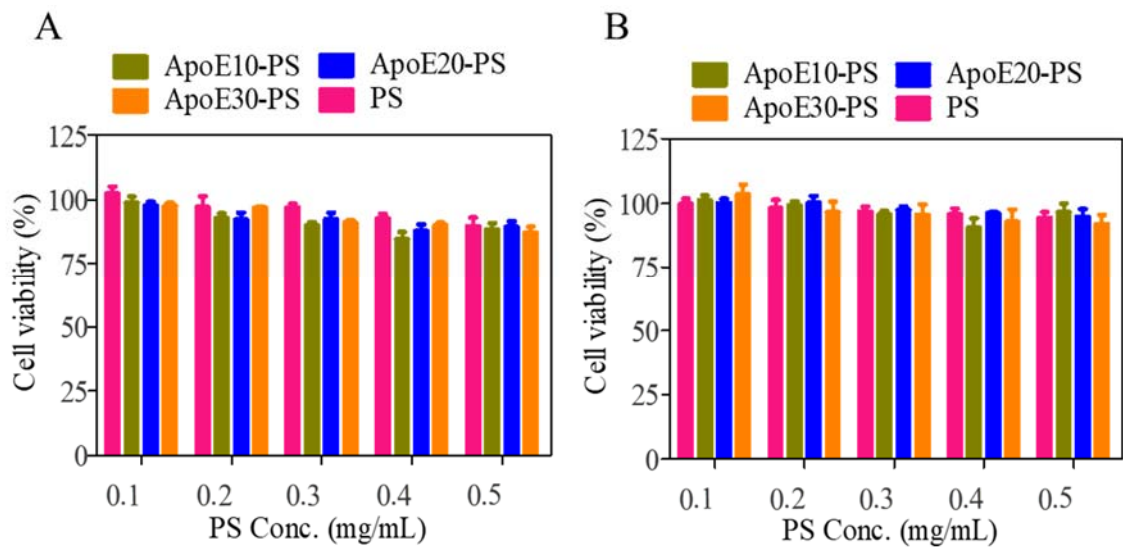

112  
113  
114

**Figure S2** MTT assays of blank ApoE-PS and PS in U-87 MG cells (A) and healthy astrocyte (B).

115

116 **References**

117

- 118 [1] Wei J, Meng H, Guo B, Zhong Z, Meng F. Organocatalytic ring-opening copolymerization  
119 of trimethylene carbonate and dithiolane trimethylene carbonate: Impact of  
120 organocatalysts on copolymerization kinetics and copolymer microstructures.  
121 *Biomacromolecules*. 2018;19:2294-2301.
- 122 [2] Jiang Y, Zhang J, Meng F, Zhong Z. Apolipoprotein E peptide-directed chimeric  
123 polymersomes mediate an ultrahigh-efficiency targeted protein therapy for glioblastoma.  
124 *ACS Nano*. 2018;12(11):11070-11079.
